# Supplementary material for: Mouse screen reveals multiple new genes underlying mouse and human hearing loss
Source: PLoS Biol. 2019 Apr 11;17(4):e3000194. doi: 10.1371/journal.pbio.3000194 (PMC6459510; doi:10.1371/journal.pbio.3000194)
Supplement: S4 Table — This table summarises information from a range of sources to indicate features of interest about the genes detected with ABR defects in this screen, illustrating the broad range of types of genes found associated with hearing impairment. Columns A–I and K–P were derived from the MGI database, with links given in column E. For column M, references to phenotype details of alleles reported here are not included, only reports of other alleles of the same gene. For column P, only selected key GO terms are listed. Column J was obtained by comparing the human gene location with unidentified non-syndromic hearing loss loci listed in the Hereditary Hearing Loss Homepage (Van Camp and Smith; http://hereditaryhearingloss.org/; accessed January 2019). Column Q was derived from violin plots of single-cell mRNAseq data presented in the gEAR portal (Herzano and colleagues; https://umgear.org; accessed January 2019). The criteria for inclusion of the genes were either (1) threshold above 95% confidence interval for at least one stimulus in 60% of mice of that genotype tested in the MGP screen, (2) *mean threshold for at least one stimulus more than 20 dB above wild-type mean, or (3) †further data obtained after screen confirmed raised thresholds in a larger n. All hits listed were in homozygotes unless noted as (Het) in column A when heterozygotes were screened. Four or more mice were screened unless a lower number is given in column A. ABR, auditory brainstem response; GO, Gene Ontology; MGI, Mouse Genome Informatics; MGP, Mouse Genetics Project; mRNAseq, messenger RNA sequence. (XLSX) [file pbio.3000194.s008.xlsx]

## Sheet: Caption
S4 Table Caption. Features of genes identified in this ABR screen.
This table summarises information from a range of sources to indicate features of interest about the genes detected with ABR defects in this screen, illustrating the broad range of types of genes found associated with hearing impairment. Columns A-I and K-P were derived from the Mouse Genome Informatics (MGI) database, with links given in column E. For column M, references to phenotype details of…

## Sheet: Table
Mouse gene symbol	Mouse gene name	Mouse gene synonyms	MGI ID	MGI gene link	NCBI human gene ID	Human orthologue gene symbol	Human synonyms	Human orthologue location	Close to unidentified non-syndromic deafness locus?	Known human disease associations, germline	OMIM disease ID	Phenotypes in other mouse alleles of same gene (excluding allele reported here)	MGI phenotype description of mouse alleles	Go term summary, human protein	GO term highlights	Hair cell expression at P1 from gEAR
Category 1 : Severe - Profound Hearing Impairment
A730017C20Rik (Minar2)	RIKEN cDNA A730017C20 gene	-	2442934	http://www.informatics.jax.org/marker/key/84108	100127206	KIAA1024L	KIAA1024L, KIAA1024-like	5q23.3; chr5:129748191-129765063 (+)	No	-	-				integral component of membrane	Very high
Spns2	spinster homolog 2	MGC:37865	2384936	http://www.informatics.jax.org/marker/key/91806	124976	SPNS2	sphingolipid transporter 2	17p13.2; chr17:4498834-4539933 (+)	No	-	-		Mice homozygous for a knock-out allele exhibit symblepharon and impaired egress of T and B cells from the thymus and bone marrow, respectively. Mice homozygous for a different knock-out allele exhibit abnormal immune system, abnormal eye morphology and absent pinna reflex.	The protein encoded by this gene is a transporter of sphingosine 1-phosphate, a secreted lipid that is important in cardiovascular, immunological, and neural development. Defects in this gene are a cause of early onset progressive hearing loss. [provided by RefSeq, Jul 2016]	sphingolipid transporter activity; lysosomal membrane; B cell homeostasis; bone development; lipid transport; sphingolipid metabolic process; lymphocyte homeostasis; regulation of humoral immune response; sphingosine-1-phosphate signaling pathway; T cell homeostasis; transmembrane transport	Low
Duoxa2	dual oxidase maturation factor 2	9030623N16Rik, Nip2	1914061	http://www.informatics.jax.org/marker/key/50791	405753	DUOXA2	SIMNIPHOM, TDH5	15q15.1; chr15:45114325-45118106 (+)	No	Thyroid Dyshormonogenesis 5; TDH5	274900	behavior, endocrine/exocrine, growth/size/body, hematopoietic, homeostasis, immune, limbs/digits/tail, mortality/aging, nervous system, respiratory, skeleton, vision/eye	Mice homozygous for a knock-out allele of Duoxa1 and 2 exhibit severe hypothyrodism with severe postnatal growth, delayed eye opening, enlarged thyroid, enlarged adenohypophysis, respiratory distress and death at weaning when weaned at 21 days.	This gene encodes an endoplasmic reticulum protein that is necessary for proper cellular localization and maturation of functional dual oxidase 2. Mutations in this gene have been associated with thyroid dyshormonogenesis 5.[provided by RefSeq, Feb 2010]	endoplasmic reticulum membrane; hydrogen peroxide metabolic process; regulation of inflammatory response; regulation of thyroid hormone generation	N/A
Zfp719 (also waveform anomaly)	zinc finger protein 719	9430094P17Rik, C630016O21Rik, mszf6	2444708	http://www.informatics.jax.org/marker/key/85607	7728	ZNF175	ZINC FINGER PROTEIN OTK18; OTK18	19q13.41; 19:51,571,236-51,589,737	No	-	-				RNA polymerase II core promoter proximal region sequence-specific DNA binding; regulation of transcription, DNA-templated	Low-moderate
Ocm (also waveform anomaly)	oncomodulin	-	97401	http://www.informatics.jax.org/marker/key/11998	654231	OCM	OCM1, OM, ONCM	7p21.1; chr7:5880798-5886363 (+)	No	-	-	hearing/vestibular/ear	Mice homozygous for a knock-out allele exhibit deafness	Oncomodulin is a high-affinity calcium ion-binding protein. It belongs to the superfamily of calmodulin proteins, also known as the EF-hand proteins. Oncomodulin is an oncodevelopmental protein found in early embryonic cells in the placenta and also in tumors. [provided by RefSeq, Jul 2008]	regulation of cytosolic calcium ion concentration	Low-moderate
Category 2 : High Frequency Hearing Impairment
Pex3 (also waveform anomaly)	peroxisomal biogenesis factor 3	1700014F15Rik, 2810027F19Rik, 2900010N04Rik	1929646	http://www.informatics.jax.org/marker/key/49808	8504	PEX3	PBD10A, TRG18	6q24.2; chr6:143450781-143490616 (+)	No	Peroxisome Biogenesis Disorder 10a (zellweger); PBD10A	614882		Homozygous mutants exhibit abnormal sebaceous gland, hair follicle bulge, and cornea morphology. An increase in B and T cell numbers and mean platelet volume, and vertebral transformation are also seen.	The product of this gene is involved in peroxisome biosynthesis and integrity. It assembles membrane vesicles before the matrix proteins are translocated. Peroxins (PEXs) are proteins that are essential for the assembly of functional peroxisomes. The peroxisome biogenesis disorders (PBDs) are a group of genetically heterogeneous autosomal recessive, lethal diseases characterized by multiple defec…	peroxisome membrane biogenesis; protein import into peroxisome membrane; mitophagy in response to mitochondrial depolarization; amino acid transmembrane transport; lipid binding; integral component of peroxisomal membrane	High
Wbp2 (also waveform anomaly)	WW domain binding protein 2		104709	http://www.informatics.jax.org/marker/key/24947	23558	WBP2	WBP-2	17q25; chr17:75845699-75855420 (-)	No	-	-			The globular WW domain is composed of 38 to 40 semiconserved amino acids shared by proteins of diverse functions including structural, regulatory, and signaling proteins. The domain is involved in mediating protein-protein interactions through the binding of polyproline ligands. This gene encodes a WW domain binding protein that is a transcriptional coactivator of estrogen receptor alpha and prog…	cellular response to estrogen stimulus; RNA polymerase II transcription coactivator activity; positive regulation of gene expression, epigenetic; chromatin DNA binding	High
Acsl4 (also waveform anomaly)	acyl-CoA synthetase long-chain family member 4	9430020A05Rik, ACS4, Facl4, Lacs4	1354713	http://www.informatics.jax.org/marker/key/45980	2182	ACSL4	ACS4, FACL4, LACS4, MRX63, MRX68	Xq22.3-q23; chrX:109641335-109733392 (-)	No	Mental Retardation, X-Linked 63; MRX63	300387	endocrine/exocrine, homeostasis, reproductive	Female heterozygotes for a targeted null mutation exhibit accumulation of prostaglandins in the uterus, reduced fertility with few and small litters, and very low transmission of the mutant allele.	The protein encoded by this gene is an isozyme of the long-chain fatty-acid-coenzyme A ligase family. Although differing in substrate specificity, subcellular localization, and tissue distribution, all isozymes of this family convert free long-chain fatty acids into fatty acyl-CoA esters, and thereby play a key role in lipid biosynthesis and fatty acid degradation. This isozyme preferentially uti…	arachidonate-CoA ligase activity; ATP binding; long-chain fatty acid-CoA ligase activity; lipid particle; mitochondrial outer membrane; neuron differentiation; peroxisome; dendritic spine development; embryonic process involved in female pregnancy; fatty acid metabolic process; fatty acid transport; negative regulation of prostaglandin secretion; regulation of fatty acid metabolic process; trigly…	High
Agap1	ArfGAP with GTPase domain, ankyrin repeat and PH domain 1	Centg2, Ggap1, mKIAA1099	2653690	http://www.informatics.jax.org/marker/key/87751	116987	AGAP1	AGAP-1, CENTG2, cnt-g2, GGAP1	2q37; chr2:236402733-237040444 (+)	No	-	-			This gene encodes a member of an ADP-ribosylation factor GTPase-activating protein family involved in membrane trafficking and cytoskeleton dynamics. This gene functions as a direct regulator of the adaptor-related protein complex 3 on endosomes. Multiple transcript variants encoding different isoforms have been found for this gene. [provided by RefSeq, Oct 2011]	GTP binding; GTPase activator activity; phospholipid binding; small GTPase mediated signal transduction; protein transport; nucleotide binding ; metal ion binding;	High
Fads3	fatty acid desaturase 3	-	1928740	http://www.informatics.jax.org/marker/key/49257	3995	FADS3	CYB5RP, LLCDL3	11q12-q13.1; chr11:61873523-61891545 (-)	No	-	-			The protein encoded by this gene is a member of the fatty acid desaturase (FADS) gene family. Desaturase enzymes regulate unsaturation of fatty acids through the introduction of double bonds between defined carbons of the fatty acyl chain. FADS family members are considered fusion products composed of an N-terminal cytochrome b5-like domain and a C-terminal multiple membrane-spanning desaturase p…	acyl-CoA desaturase activity; oxidoreductase activity; endoplasmic reticulum; fatty acid biosynthetic process; lipid metabolic process; oxidation-reduction process; transport	Very low
Fbxo33	F-box protein 33	5730501N20Rik	1917861	http://www.informatics.jax.org/marker/key/54591	254170	FBXO33	BMND12, c14_5247, Fbx33	14q21.1; chr14:39396373-39432500 (-)	No	-	-					N/A
Brd2 (Het)	bromodomain containing 2	D17H6S113E, Frg-1, Fsrg1, Ring3, Rnf3	99495	http://www.informatics.jax.org/marker/key/40295	6046	BRD2	D6S113E, FSH, FSRG1, NAT, O27.1.1, RING3, RNF3	6p21.3; chr6:32968660-32981505 (+)	DFNA31, DFNA21	-	-	cellular, embryogenesis, growth/size/body, mortality/aging, nervous system; adipose, behavior, endocrine/exocrine, homeostasis, immune, liver/biliary, craniofacial	Mice homozygous for a null mutation display embryonic lethality during organogenesis with decreased embryo size, decreased cell proliferation, a delay in the cell cycle, and increased cell death. Heterozygous mice also display decreased cell proliferation.	This gene encodes a transcriptional regulator that belongs to the BET (bromodomains and extra terminal domain) family of proteins. This protein associates with transcription complexes and with acetylated chromatin during mitosis, and it selectively binds to the acetylated lysine-12 residue of histone H4 via its two bromodomains. The gene maps to the major histocompatability complex (MHC) class II…	chromatin modification; lysine-acetylated histone binding; nucleosome assembly; regulation of transcription from RNA polymerase II promoter	High
Mkrn2	makorin, ring finger protein, 2	2610002L04Rik	1914277	http://www.informatics.jax.org/marker/key/51007	23609	MKRN2	RNF62	3p25; chr3:12557014-12583713 (+)	No	-	-			This gene encodes a probable E3 ubiquitin ligase containing several zinc finger domains, that is a member of the makorin RING zinc-finger protein family. This gene overlaps the v-raf-1 murine leukemia viral oncogene homolog 1 (RAF1) gene in an antisense orientation and may have a co-regulatory function with RAF1. Alternative splicing results in multiple transcript variants. [provided by RefSeq, N…	ligase activity; coenzyme F420-0 gamma-glutamyl ligase activity; coenzyme F420-2 alpha-glutamyl ligase activity; ribosomal S6-glutamic acid ligase activity; tubulin-glutamic acid ligase activity; tubulin-glycine ligase activity; UDP-N-acetylmuramoylalanyl-D-glutamyl-2,6-diaminopimelate-D-alanyl-D-alanine ligase activity	High
D6Wsu163e	DNA segment, Chr 6, Wayne State University 163, expressed		107893	http://www.informatics.jax.org/marker/key/29226	57102	C12orf4		12p13.3; chr12:4487730-4538508 (-)	No					This gene is highly conserved from nematodes to humans. In rat, the orthologous gene encodes a cytoplasmic protein that is involved in mast cell degranulation. The human gene has been implicated in autosomal recessive intellectual disability. [provided by RefSeq, Sep 2016]	regulation of mast cell degranulation	Low
Gpr152	G protein-coupled receptor 152	A930009H15Rik, LOC269053	2685519	http://www.informatics.jax.org/marker/key/97891	390212	GPR152	PGR5	11q13.2; chr11:67218772-67220200 (-)	No	-	-				angiotensin receptor activity; integral component of plasma membrane; signal transduction	N/A
Category 3 : Low Frequency Hearing Impairment
Klhl18 (also waveform anomaly)	kelch-like 18	MGC:36415	2143315	http://www.informatics.jax.org/marker/key/70755	23276	KLHL18		3p21.31; chr3:47324116-47388306 (+)	No	-	-				Cul3-RING ubiquitin ligase complex; contributes_to ubiquitin-protein transferase activity	Low-moderate
Camsap3	calmodulin regulated spectrin-associated protein family, member 3	2310057J16Rik, Nezha	1916947	http://www.informatics.jax.org/marker/key/53677	57662	CAMSAP3	KIAA1543, NEZHA, PPP1R80	19p13.2; chr19:7595888-7618310 (+)	DFNA57	-	-				calmodulin binding; microtubule minus-end binding; spectrin binding; zonula adherens; epithelial cell-cell adhesion; microtubule cytoskeleton organization; regulation of organelle organization	Low-moderate
Category 4 : Moderate (& Variable) Hearing Impairment
Klc2 (also waveform anomaly)	kinesin light chain 2	8030455F02Rik	107953	http://www.informatics.jax.org/marker/key/29288	64837	KLC2		11q13.2; chr11:66024765-66035332 (+)	No	Spastic Paraplegia, Optic Atrophy, and Neuropathy; SPOAN	609541			The protein encoded by this gene is a light chain of kinesin, a molecular motor responsible for moving vesicles and organelles along microtubules. Defects in this gene are a cause of spastic paraplegia, optic atrophy, and neuropathy (SPOAN) syndrome. [provided by RefSeq, Mar 2016]	kinesin binding; microtubule motor activity; ciliary rootlet; neuron projection; axo-dendritic transport; microtubule-based movement	Low-moderate
Adgrb1/Bai1 (also waveform anomaly)	adhesion G protein-coupled receptor B1	B830018M07Rik, Bai1	1933736	http://www.informatics.jax.org/marker/key/64848	575	ADGRB1	GDAIF	8q24.3; chr8:143545377-143626369 (+)	No	-	-		Supporting cells, cochlear neurons 4/30	Angiogenesis is controlled by a local balance between stimulators and inhibitors of new vessel growth and is suppressed under normal physiologic conditions. Angiogenesis has been shown to be essential for growth and metastasis of solid tumors. In order to obtain blood supply for their growth, tumor cells are potently angiogenic and attract new vessels as results of increased secretion of inducers…	G-protein coupled receptor activity; transmembrane signaling receptor activity; postsynaptic density; positive regulation of synapse assembly; negative regulation of angiogenesis	Low
Tram2	translocating chain-associating membrane protein 2	C330003D03Rik, MGC:25725	1924817	http://www.informatics.jax.org/marker/key/61547	9697	TRAM2		6p21.1-p12; chr6:52362200-52441862 (-)	No	-	-	behavior, growth/size/body, hearing/vestibular/ear, homeostasis, limbs/digits/tail, mortality/aging, skeleton		TRAM2 is a component of the translocon, a gated macromolecular channel that controls the posttranslational processing of nascent secretory and membrane proteins at the endoplasmic reticulum (ER) membrane.[supplied by OMIM, Jul 2004]	integral component of membrane; rough endoplasmic reticulum; protein transport; cotranslational protein targeting to membrane; collagen biosynthetic process	Low
Pax9 (adjacent to Slc25a21)	paired box 9	Pax-9	97493	http://www.informatics.jax.org/marker/key/12187	5083	PAX9	STHAG3	14q13.3; chr14:37126773-37147012 (+)	No	Tooth Agenesis, Selective, 3; STHAG3	604625	craniofacial, growth/size/body; mortality/aging, reproductive; digestive/alimentary, hearing/vestibular/ear, limbs/digits/tail, skeleton; behavior, endocrine/exocrine, hematopoietic, immune, embryo, muscle, respiratory	Homozygous inactivation of this gene results in abnormal tooth development and absent teeth and may lead to lack of pharyngeal pouch derivatives, athymia, craniofacial and limb anomalies, a small tympanic ring, various defects of the skeleton and musculature, and neonatal lethality.	This gene is a member of the paired box (PAX) family of transcription factors. Members of this gene family typically contain a paired box domain, an octapeptide, and a paired-type homeodomain. These genes play critical roles during fetal development and cancer growth. Mice lacking this gene exhibit impaired development of organs, musculature and the skeleton, including absent and abnormally devel…	RNA polymerase II regulatory region sequence-specific DNA binding; transcription factor activity, sequence-specific DNA binding; cellular response to growth factor stimulus; regulation of transcription, DNA-templated; multicellular organism development; endoderm development; face morphogenesis; odontogenesis	Low
Ywhae	tyrosine 3-monooxygenase/tryptophan 5-monooxygenase activation protein, epsilon polypeptide		894689	http://www.informatics.jax.org/marker/key/32959	7531	YWHAE	14-3-3E, HEL2, KCIP-1, MDCR, MDS	17p13.3; chr17:1247834-1303556 (-)	No	Left Ventricular Noncompaction 1; LVNC1 : Miller-Dieker Lissencephaly Syndrome; MDLS	604169, 247200	cardiovascular, cellular, homeostasis, mortality/aging, muscle, nervous system, reproductive	Mice homozygous for disruptions of this gene usually die around birth. The small percentage of survivors are small in size and display central nervous system abnormalities including a thinner cortex and a disorganized pyramidal cell layer in the hippocampus.	This gene product belongs to the 14-3-3 family of proteins which mediate signal transduction by binding to phosphoserine-containing proteins. This highly conserved protein family is found in both plants and mammals, and this protein is 100% identical to the mouse ortholog. It interacts with CDC25 phosphatases, RAF1 and IRS1 proteins, suggesting its role in diverse biochemical activities related t…	cadherin binding involved in cell-cell adhesion; histone deacetylase binding; MCH class II protein complex binding; poly(A) RNA binding; potassium channel regulator activity; phosphoserine binding; protein heterodimerization activity; ubiquitin protein ligase binding; axon; adherans junction; extracellular exosome; focal adhesion; kinesin complex; mitochondrion; neuron migration; negative regulat…	Very high
Mcph1	microcephaly, primary autosomal recessive 1	5430437K10Rik, BRIT1, D030046N04Rik	2443308	http://www.informatics.jax.org/marker/key/84442	79648	MCPH1	BRIT1, MCT	8p23.1; chr8:6264113-6501140 (+)	DFNM2	Microcephaly 1, Primary, Autosomal Recessive; MCPH1	251200	cellular, endocrine/exocrine, growth/size/body, hematopoietic, homeostasis, immune, mortality/aging, reproductive; nervous system;	Homozygous null mice are born at a reduced rate and display male and female infertility and arrest of male meiosis. Mice homozygous for another knock-out allele exhibit microcephaly, infertility, decreased brain size, impaired neuroprogenitor proliferation and apoptosis, and mitosis.	This gene encodes a DNA damage response protein. The encoded protein may play a role in G2/M checkpoint arrest via maintenance of inhibitory phosphorylation of cyclin-dependent kinase 1. Mutations in this gene have been associated with primary autosomal recessive microcephaly 1 and premature chromosome condensation syndrome. Alternatively spliced transcript variants have been described. [provided…	regulation of gene expression; regulation of inflammatory response; regulation of chromosome condensation; regulation of centrosome cycle; regulation of kinase activity; protein localization to centrosome; mitotic cell cycle arrest; establishment of mitotic spindle orientation; cytoskeleton; bone development; cerebral cortex development; neuronal stem cell population maintenance	Low-moderate
Lrig1	leucine-rich repeats and immunoglobulin-like domains 1	Img, LIG-1	107935	http://www.informatics.jax.org/marker/key/29270	26018	LRIG1	LIG1, LIG-1	3p14; chr3:66429221-66550845 (-)	No	-	-	cellular, craniofacial, growth/size/body, integument, limbs/digits/tail; hearing/vestibular/ear	Homozygous null mice developed psoriasiform epidermal hyperplasia. Homozygotes exhibit hair follicle, epidermis, vertebral, eye and hearing abnormalities, decreased body size and fat amount, and increased susceptibility to bacterial infection.		sensory perception of sound; otolith morphogenesis; innervation; integral component of membrane	Low-moderate
Category 5 : Mild Hearing Impairment
Herc1	HECT and RLD domain containing E3 ubiquitin protein ligase family member 1	2810449H11Rik, D130015N03Rik, MGC:7618, tbl	2384589	http://www.informatics.jax.org/marker/key/81282	8925	HERC1	MDFPMR, p532, p619	15q22; chr15:63608618-63833949 (-)	No	Macrocephaly, Dysmorphic Facies, and Psychomotor Retardation; MDFPMR	617011	behavior, growth/size/body, mortality/aging, nervous system	Homozygotes for this spontaneous mutation exhibit an abnormal cerebellar Purkinje cell layer and Purkinje cell degeneration.	This gene encodes a member of the HERC protein family. This protein stimulates guanine nucleotide exchange on ARF1 and Rab proteins. This protein may be involved in membrane transport processes. [provided by RefSeq, Mar 2012]	cerebellar Purkinje cell differentiation; negative regulation of autophagy; neuron projection development; neuromuscular process controlling balance	N/A
Csnk1g3	casein kinase 1, gamma 3	3300002K07Rik, C330049O21Rik	1917675	http://www.informatics.jax.org/marker/key/54405	1456	CSNK1G3	CKI-gamma 3, CSNK1G3L	5q23; chr5:123512099-123617045 (+)	No	-	-			This gene encodes a member of a family of serine/threonine protein kinases that phosphorylate caseins and other acidic proteins. A related protein in the African clawed frog participates in the transmission of Wnt/beta-catenin signaling. Alternatively spliced transcript variants encoding multiple isoforms have been observed for this gene. [provided by RefSeq, Jul 2012]	ATP binding; glycoprotein binding; protein serine/threonine kinase activity; transferase activity; endocytosis; peptidyl-serine phosphorylation; Wnt signaling pathway	Moderate
Srsf7 (Het) †	serine/arginine-rich splicing factor 7	9430065L19Rik, 9G8, NX-96, Sfrs7	1926232	http://www.informatics.jax.org/marker/key/48420	6432	SRSF7	9G8, AAG3, SFRS7	2p22.1; chr2:38743599-38751494 (-)	No	-	-			The protein encoded by this gene is a member of the serine/arginine (SR)-rich family of pre-mRNA splicing factors, which constitute part of the spliceosome. Each of these factors contains an RNA recognition motif (RRM) for binding RNA and an RS domain for binding other proteins. The RS domain is rich in serine and arginine residues and facilitates interaction between different SR splicing factors…	zinc ion binding, nucleotide binding, poly(A) RNA binding, RNA splicing	High
Cdk14 *	cyclin-dependent kinase 14	mKIAA0834, Pftk1	894318	http://www.informatics.jax.org/marker/key/32828	5218	CDK14	PFTAIRE1, PFTK1	7q21-q22; chr7:90596362-91210590 (+)	No	-	-	skeleton		PFTK1 is a member of the CDC2 (MIM 116940)-related protein kinase family (Yang and Chen, 2001 [PubMed 11313143]).[supplied by OMIM, Mar 2008]	ATP binding; cyclin-dependent protein serine/threonine kinase activity; G2/M transition of mitotic cell cycle; protein phosphorylation; regulation of canonical Wnt signalling pathway	Moderate
Selk/Selinok *	selenoprotein K	1110001C03Rik, 30kDa, HSPC030	1931466	http://www.informatics.jax.org/marker/key/63399	58515	SELKINOK	HSPC030, HSPC297, SelK	3p21.31; chr3:53885199-53891962 (-)	No	-	-	cellular, hematopoietic, homeostasis, immune, mortality/aging; growth/size/body, skeleton	Mice homozygous for a knock-out allele exhibit impaired T cell, neutrophil, and macrophage calcium flux and increased susceptibility to viral infection	This gene encodes a selenoprotein, which contains a selenocysteine (Sec) residue at its active site. The selenocysteine is encoded by the UGA codon that normally signals translation termination. The 3' UTR of selenoprotein genes have a common stem-loop structure, the sec insertion sequence (SECIS), that is necessary for the recognition of UGA as a Sec codon rather than as a stop signal. This sele…	integral component of membrane; endoplasmic reticulum calcium ion homeostasis; intrinsic apoptotic signaling pathway in response to endoplasmic reticulum stress; macrophage derived foam cell differentiation; positive regulation of interleukin-6 secretion; positive regulation of monocyte chemotactic protein-1 production; positive regulation of T cell proliferation/migration; positive regulation of…	Very high
Gas2l2	growth arrest-specific 2 like 2	OTTMUSG00000000934	3652048	http://www.informatics.jax.org/marker/key/201607	246176	GAS2L2	GAR17	17q12; chr17:35744511-35753745 (-)	No	-	-			The protein encoded by this gene appears to crosslink microtubules and microfilaments and may be part of the cytoskeleton. This gene is mainly expressed in skeletal muscle. [provided by RefSeq, Jul 2011]	actin filament binding, microtubule binding, cytoskeletal adaptor activity, microtubule bundle formation, negative regulation of microtubule depolymerization	N/A
Bhlhe40	basic helix-loop-helix family, member e40	Bhlhb2, Clast5, C130042M06Rik, CR8, cytokine response gene 8, DEC1, eip1 (E47 interaction protein 1), Stra13, Stra14, Sharp2	1097714	http://www.informatics.jax.org/marker/key/33739	8553	BHLHE40	BHLHB2, Clast5, DEC1, HLHB2, SHARP2, SHARP-2, STRA13, Stra14	3p26.1; chr3:4979412-4985181 (+)	No	-	-		Homozygous mutation of this gene results in impaired immune function and hyperplasia of the lymphoid organs. Aging mutant animals exhibit autoimmune disease.	This gene encodes a basic helix-loop-helix protein expressed in various tissues. The encoded protein can interact with ARNTL or compete for E-box binding sites in the promoter of PER1 and repress CLOCK/ARNTL's transactivation of PER1. This gene is believed to be involved in the control of circadian rhythm and cell differentiation. [provided by RefSeq, Feb 2014]	bHLH transcription factor binding, E-box binding, MRF binding, protein dimerization activity, RNA polymerase II activating transcription factor binding, transcription corepressor activity, response to light stimulus, circadian regulation of gene expression, entrainment of circadian clock by photoperiod	Low
Usp42 * (also waveform anomaly)	ubiquitin specific peptidase 42	2410140K03Rik, 3110031A07Rik, A630018G05Rik, D5Ertd591e	1924050	http://www.informatics.jax.org/marker/key/60780	84132	USP42		7p22.1; chr7:6078743-6161564 (+)	DFNB90	-	-				cysteine-type peptidase activity, thiol-dependent ubiquitin-specific protease activity, protein deubiquitination, ubiquitin-dependent protein catabolic process, spermatogenesis	High
Cxcr2 *	chemokine (C-X-C motif) receptor 2	CD128, Cmkar2, Gpcr16, IL8RA, Il8rb, IL-8rb, IL-8Rh	105303	http://www.informatics.jax.org/marker/key/25782	3579	CXCR2	CD182, CDw128b, CMKAR2, IL8R2, IL8RA, IL8RB	2q35; chr2:218125290-218137253 (+)	No	-	-	cardiovascular, cellular, endocrine/exocrine, growth/size/body, hematopoietic, homeostasis, immune, mortality/aging, neoplasm, nervous system, renal/urinary, liver/biliary; reproductive, respiratory, skeleton, vision/eye	Mice homozygous for a targeted null mutation are viable and fertile but exhibit splenomegaly, lymphadenopathy, and increased susceptibility to various pathogens due to impaired neutrophil recruitment and decreased pathogen clearance during innate immune responses.	The protein encoded by this gene is a member of the G-protein-coupled receptor family. This protein is a receptor for interleukin 8 (IL8). It binds to IL8 with high affinity, and transduces the signal through a G-protein activated second messenger system. This receptor also binds to chemokine (C-X-C motif) ligand 1 (CXCL1/MGSA), a protein with melanoma growth stimulating activity, and has been sh…	C-X-C chemokine receptor activity; interleukin-8 receptor activity; signal transducer activity; mast cell granule; acute inflammatory response to antigenic stimulus; cellular defence response; chemotaxis; metanephric tubule morphogenesis; negative regulation of apoptotic process; neutrophil activation; phospholipase C-activating G-protein coupled receptor signlling pathway; positive regulator of …	N/A
Setd5 (Het) *	SET domain containing 5	2900045N06Rik, mKIAA1757	1920145	http://www.informatics.jax.org/marker/key/56875	55209	SETD5		3p25.3; chr3:9397700-9478154 (+)	No	Mental Retardation, Autosomal Dominant 23; MRD23	615761					High
Mir122	microRNA 122	Mir122a, Mirn122a, mmu-mir-122, mmu-mir-122a	2676805	http://www.informatics.jax.org/marker/key/93148		-			N/A	-	-	hematopoietic, homeostasis, immune, liver/biliary, neoplasm	Mice homozygous for a knock-out allele exhibit steatohepatitis with fibrosis and hepatocellular carcinoma.		BMP signaling pathway, cellular response to amino acid stimulus, erythrocyte differentiation, multicellular organismal iron ion homeostasis, regulation of gene expression	N/A
Fam107b (also waveform anomaly)	family with sequence similarity 107, member B	3110001A13Rik	1913790	http://www.informatics.jax.org/marker/key/50520	83641	FAM107B	C10orf45	10p13; chr10:14560559-14816896 (-)	No	-	-				sensory perception of sound	High
Phf20	PHD finger protein 20	6820402O20Rik	2444148	http://www.informatics.jax.org/marker/key/85138	51230	PHF20	C20orf104, GLEA2, HCA58, NZF, TDRD20A, TZP	20q11.22-q11.23; chr20:34359923-34538288 (+)	No	-	-	adipose, endocrine/exocrine, growth/size/body, hematopoietic, immune, mortality/aging, skeleton	Mice homozygous for a knockout allele exhibit neonatal lethality, decreased body size and abnormal skeletal and hematopoietic development.		contributes_to histone acetyltransferase activity (H4-K16, H4-K5, H4-K8); zinc ion binding; MLL1 complex; covalent chromatin modification; histone H4-K16, H4-K5, H4-K8 acetylation; regulation of transcription, DNA-templated	High
Zcchc14 (n=3)	zinc finger, CCHC domain containing 14	Bdg29	2159407	http://www.informatics.jax.org/marker/key/79429	23174	ZCCHC14	BDG29, BDG-29	16q24.2; chr16:87439852-87525870 (-)	No	-	-				zinc ion binding, phosphatidylinositol binding, nucleic acid binding	High
Category 6 : Normal Sensitivity with Abnormal Waveform
1500011B03Rik	RIKEN cDNA 1500011B03 gene	-	1913486	http://www.informatics.jax.org/marker/key/50216		-			N/A	-	-					N/A
Akap9	A kinase (PRKA) anchor protein (yotiao) 9	5730481H23Rik, AKAP450, G1-448-15, mei2-5, mKIAA0803, repro12	2178217	http://www.informatics.jax.org/marker/key/81389	10142	AKAP9	AKAP350, AKAP450, AKAP-9, CG-NAP, HYPERION, LQT11, MU-RMS-40.16A, PPP1R45, PRKA9, YOTIAO	7q21.2; chr7:91940867-92110673 (+)	No	Long QT Syndrome 11; LQT11	611820	endocrine/exocrine, reproductive	Mice homozygous for a chemically induced allele exhibit male infertily with abnormal spermatogenesis and Sertoli maturation.		protein kinase A regulatory subunit binding, protein complex scaffold, centrosome, ciliary basal body, neuronal cell body, dendritic branch, synaptic membrane, negative regulation of adenylate cyclase activity, Sertoli cell development, spermatogenesis, signal transduction	High
Ankrd9	ankyrin repeat domain 9	2500003O20Rik	1921501	http://www.informatics.jax.org/marker/key/58231	122416	ANKRD9		14q32.31; chr14:102503649-102509791 (-)	No	-	-				hydrolase activity	Low-moderate
Arid4a	AT rich interactive domain 4A (RBP1-like)	A630067N03Rik, Rbbp1	2444354	http://www.informatics.jax.org/marker/key/85317	5926	ARID4A	RBBP1, RBBP-1, RBP1, RBP-1	14q23.1; chr14:58298385-58373995 (+)	No	Leukemia, Acute Myeloid; AML	601626	behavior, cardiovascular, cellular, endocrine/exocrine, hematopoietic, immune, integument, liver/biliary, mortality/aging, neoplasm, reproductive, respiratory, skeleton	Mice homozygous for a knock-out allele exhibit altered DNA methylation patterns, disrupted hematopoiesis and a portion develop acute myeloid leukemia.	The protein encoded by this gene is a ubiquitously expressed nuclear protein. It binds directly, with several other proteins, to retinoblastoma protein (pRB) which regulates cell proliferation. pRB represses transcription by recruiting the encoded protein. This protein, in turn, serves as a bridging molecule to recruit HDACs and, in addition, provides a second HDAC-independent repression function…	transcriptional repressor complex, erythrocyte development, establishment of Sertoli cell barrier, histone H3-K4 trimethylation, histone H3-K9 trimethylation, histone H4-K20 trimethylation, positive regulation of transcription from RNA polymerase II promoter, negative regulation of transcription, DNA-templated, spermatogenesis, regulation of gene expression by genetic imprinting	High
Atp5a1 (Het)	ATP synthase, H+ transporting, mitochondrial F1 complex, alpha subunit 1	Atpm, D18Ertd206e, Mom2	88115	http://www.informatics.jax.org/marker/key/470	498	ATP5A1	ATP5A, ATP5AL2, ATPM, COXPD22, hATP1, HEL-S-123m, MC5DN4, MOM2, OMR, ORM	18q21.1; chr18:46084144-46104233 (-)	No	Combined Oxidative Phosphorylation Deficiency 22; COXPD22 : Mitochondrial Complex V (atp Synthase) Deficiency, Nuclear Type 4	616045 : 615228		Mice carrying a targeted mutation of this gene display preweaning and embryonic lethality. Heterozygous mutants exhibit decreased body weight and lean body mass and reduced circulating insulin, serum albumin, and total protein levels.	This gene encodes a subunit of mitochondrial ATP synthase. Mitochondrial ATP synthase catalyzes ATP synthesis, using an electrochemical gradient of protons across the inner membrane during oxidative phosphorylation. ATP synthase is composed of two linked multi-subunit complexes: the soluble catalytic core, F1, and the membrane-spanning component, Fo, comprising the proton channel. The catalytic p…	ATPase activity, MHC class I protein binding, poly(A) RNA binding, proton-transporting ATP synthase activity, rotational mechanism, colocalizes_with COP9 signalosome, mitochondrial proton-transporting ATP synthase complex, myelin sheath, ATP synthesis coupled proton transport, embryo development, lipid metabolic process, negative regulation of endothelial cell proliferation, proton transport	High
Fam175b	family with sequence similarity 175, member B	C430003P19Rik, KIAA0157	1926116	http://www.informatics.jax.org/marker/key/62846	23172	FAM175B	ABRO1, KIAA0157	10q26.13; chr10:124801785-124836670 (+)	No	-	-				microtubule binding, polyubiquitin binding, BRISC complex, colocalizes_with centrosome, colocalizes_with microtubule minus-end, attachment of spindle microtubules to kinetochore, mitotic cell cycle, negative regulation of apoptotic process, protein K63-linked deubiquitination, response to ischemia	High
Gprc5b	G protein-coupled receptor, family C, group 5, member B	hypothetical protein, clone 2-63	1927596	http://www.informatics.jax.org/marker/key/48957	51704	GPRC5B	RAIG2, RAIG-2	16p12.3; chr16:19858971-19886045 (-)	No	-	-	behavior, mortality/aging, reproductive	Mice homozygous for a reporter allele exhibit partial neonatal and postnatal lethality, altered spontaneous activity pattern, and decreased response to a new environment.	This gene encodes a member of the type 3 G protein-coupled receptor family. Members of this superfamily are characterized by a signature 7-transmembrane domain motif. The encoded protein may modulate insulin secretion and increased protein expression is associated with type 2 diabetes. Alternative splicing results in multiple transcript variants. [provided by RefSeq, Feb 2015]	G-protein coupled receptor activity, protein kinase activator activity, glucose homeostasis, locomotory behavior, positive regulation of canonical Wnt signaling pathway, positive regulation of I-kappaB kinase/NF-kappaB signaling, positive regulation of macrophage cytokine production, positive regulation of neuron differentiation, positive regulation of protein tyrosine kinase activity, regulates …	Low-moderate
Gsk3a	glycogen synthase kinase 3 alpha	2700086H06Rik	2152453	http://www.informatics.jax.org/marker/key/116735	2931	GSK3A		19q13.2; chr19:42230186-42242584 (-)	No	-	-	adipose, growth/size/body, homeostasis, liver/biliary	Mice homozygous for a null allele exhibit improved glucose tolerance, increased insulin sensitivity, decreased fat mass and increased lean mass.	This gene encodes a multifunctional Ser/Thr protein kinase that is implicated in the control of several regulatory proteins including glycogen synthase, and transcription factors, such as JUN. It also plays a role in the WNT and PI3K signaling pathways, as well as regulates the production of beta-amyloid peptides associated with Alzheimer's disease. [provided by RefSeq, Oct 2011]		Low-moderate
Hp1bp3	heterochromatin protein 1, binding protein 3	Hp1bp74, MGC:28927	109369	http://www.informatics.jax.org/marker/key/31411	50809	HP1BP3	HP1BP74, HP1-BP74	1p36.12; chr1:20742677-20787310 (-)	DFNB96?	-	-	chromatin binding; cellular response to hypoxia	Mice homozygous for a knock-out allele exhibit postnatal lethality and reduced body weight.			High
Kmt5b	lysine methyltransferase 5B	C630029K18Rik, Suv420h1, Suv4-20h1	2444557	http://www.informatics.jax.org/marker/key/85480	51111	KMT5B	CGI85, CGI-85, SUV420H1	11q13.2; chr11:68154863-68213783 (-)	No	-	-	growth/size/body, mortality/aging, respiratory	Mice homozygous for a knock-out allele are born at sub-Mendelian ratios, are smaller than control littermates, and die within a few hours of birth, probably due to alveolar defects.	This gene encodes a protein that contains a SET domain. SET domains appear to be protein-protein interaction domains that mediate interactions with a family of proteins that display similarity with dual-specificity phosphatases (dsPTPases). The function of this gene has not been determined. Several alternatively spliced transcript variants encoding different isoforms have been found for this gene…		High
Kptn	kaptin	2310042D10Rik, 2E4, actin-binding protein, C030013F01Rik	1890380	http://www.informatics.jax.org/marker/key/82222	11133	KPTN	2E4, MRT41	19q13.32; chr19:47475141-47486791 (-)	No	Mental Retardation, Autosomal Recessive 41; MRT41	615637		Mice homozygous for a knock-out allele exhibit increased body weight, increased susceptibility to bacterial infection and abnormal homeostasis.	This gene encodes a filamentous-actin-associated protein, which is involved in actin dynamics and plays an important role in neuromorphogenesis. Mutations in this gene result in recessive mental retardation-41. Alternatively spliced transcript variants have been found for this gene. [provided by RefSeq, Apr 2014]	actin filament organization	Low-moderate
Ldhb	lactate dehydrogenase B	H-Ldh, lactate dehydrogenase-B, Ldh-2	96763	http://www.informatics.jax.org/marker/key/10789	3945	LDHB	HEL-S-281, LDH-B, LDHBD, LDH-H, TRG-5	12p12.1; chr12:21635341-21657971 (-)	DFNB62	Lactate Dehydrogenase B Deficiency; LDHBD	614128		Electrophoretic variants of LDHB are determined by: the a allele with fast anodal mobility in all inbred strains tested; and the b allele with slower mobility in Peru-Coppock stock. Three additional variants are known in wild M. spretus from southern France and Spain. Alleles are codominant.	This gene encodes the B subunit of lactate dehydrogenase enzyme, which catalyzes the interconversion of pyruvate and lactate with concomitant interconversion of NADH and NAD+ in a post-glycolysis process. Alternatively spliced transcript variants have been found for this gene. Recent studies have shown that a C-terminally extended isoform is produced by use of an alternative in-frame translation …	lactate biosynthetic process from pyruvate; carboxylic acid metabolic process; carbohydrate metabolic process; oxidation-reduction process; myelin sheath; mitochondrion; L-lactate dehydrogenase activity	Very high
Mapk10	mitogen-activated protein kinase 10	C230008H04Rik, JNK3, p493F12, Serk2	1346863	http://www.informatics.jax.org/marker/key/43343	5602	MAPK10	JNK3, JNK3A, p493F12, p54bSAPK, PRKM10, SAPK1b	4q21.3; chr4:86012299-86594110 (-)	DFNA24	-	-	behavior, cellular, homeostasis, nervous system	Mice homozygous for disruptions in this gene display a normal phenotype. They are resistant to kainic acid induced seizures and show increased resistance to MPTP induced Parkinson's disease.	The protein encoded by this gene is a member of the MAP kinase family. MAP kinases act as integration points for multiple biochemical signals and are involved in a wide variety of cellular processes, such as proliferation, differentiation, transcription regulation and development. This kinase is specifically expressed in a subset of neurons in the nervous system and is activated by threonine and …	JUN kinase activity; protein serine/threonine kinase activity; mitochondrion; plasma membrane; postsynaptic density; locomotor rhythm; regulation of circadian rhythm; response to light stimulus	Low
Nacad	NAC alpha domain containing	mKIAA0363	3603030	http://www.informatics.jax.org/marker/key/157115	23148	NACAD		7p13; chr7:45080437-45088961 (-)	No	-	-					Low-moderate
Ncaph2 (Het)	non-SMC condensin II complex, subunit H2	0610010J20Rik, 2610524G04Rik, D15Ertd785e, Kleisin beta	1289164	http://www.informatics.jax.org/marker/key/37432	29781	NCAPH2	CAPH2	22q13.33; chr22:50508215-50524780 (+)	DFNB40	-	-	endocrine/exocrine, hematopoietic, immune; cellular, mortality/aging, nervous system	Mice homozygous for an ENU-induced single point mutation display a specific defect in T cell development but are otherwise viable, fertile and overtly healthy with no apparent defects in B cell development. Homozygous null mice die before E12.5.	This gene encodes one of the non-SMC subunits of the condensin II complex. This complex plays an essential role in mitotic chromosome assembly. Alternate splicing of this gene results in multiple transcript variants.[provided by RefSeq, May 2010]	T cell differentiation in thymus	High
Ppp5c	protein phosphatase 5, catalytic subunit	ANP receptor, PP5	102666	http://www.informatics.jax.org/marker/key/18616	5536	PPP5C	PP5, PPP5, PPT	19q13.32; chr19:46346994-46390975 (+)	No	-	-	cellular, growth/size/body, hematopoietic, immune, mortality/aging, reproductive	Mice homozygous for a null allele exhibit a decrease in cell cycle check-point arrest following treatment with ionizing radition.	This gene encodes a serine/threonine phosphatase which is a member of the protein phosphatase catalytic subunit family. Proteins in this family participate in pathways regulated by reversible phosphorylation at serine and threonine residues; many of these pathways are involved in the regulation of cell growth and differentiation. The product of this gene has been shown to participate in signaling…	phosphoprotein phosphatase activity; RNA binding uses Six3os1; response to morphine	High
Prkab1 (Het)	protein kinase, AMP-activated, beta 1 non-catalytic subunit	1300015D22Rik	1336167	http://www.informatics.jax.org/marker/key/40314	5564	PRKAB1	AMPK, HAMPKb	12q24.23; chr12:119667864-119681624 (+)	No	-	-	behavior, cellular, growth/size/body, mortality/aging, nervous system, vision/eye; adipose, homeostasis, immune, liver/biliary	Mice homozygous for a gene trapped allele exhibit impaired brain development, seizures, reduced body weight, and die prior to weaning. Mice homozygous for a knock-out allele exhibit resistance to diet induced obesity, liver steatosis, and hyperinsulinemia.	The protein encoded by this gene is a regulatory subunit of the AMP-activated protein kinase (AMPK). AMPK is a heterotrimer consisting of an alpha catalytic subunit, and non-catalytic beta and gamma subunits. AMPK is an important energy-sensing enzyme that monitors cellular energy status. In response to cellular metabolic stresses, AMPK is activated, and thus phosphorylates and inactivates acetyl…	AMP-activated protein kinase activity; protein binding happens in skeletal musculature; fatty acid metabolic process	High
Prmt7	protein arginine N-methyltransferase 7	4933402B05Rik, MGC:7929	2384879	http://www.informatics.jax.org/marker/key/82547	54496	PRMT7	SBIDDS	16q22.1; chr16:68310974-68358829 (+)	No	Short Stature, Brachydactyly, Intellectual Developmental Disability, and Seizures; SBIDDS	617157			Arginine methylation is an apparently irreversible protein modification catalyzed by arginine methyltransferases, such as PMT7, using S-adenosylmethionine (AdoMet) as the methyl donor. Arginine methylation is implicated in signal transduction, RNA transport, and RNA splicing (Miranda et al., 2004 [PubMed 15044439]).[supplied by OMIM, Mar 2008]	histone methyltransferase activity (H4-R3 specific); protein-arginine omega-N symmetric methyltransferase activity; DNA methylation involved in gamete generation; histone arginine methylation; histone H4-R3 methylation; peptidyl-arginine N-methylation; regulation of gene expression by genetic imprinting	Moderate
Prrt2	proline-rich transmembrane protein 2	1500031I19Rik	1916267	http://www.informatics.jax.org/marker/key/52997	112476	PRRT2	BFIC2, BFIS2, DSPB3, DYT10, EKD1, FICCA, ICCA, IFITMD1, PKC	16p11.2; chr16:29811394-29815881 (+)	No	Convulsions, Familial Infantile, with Paroxysmal Choreoathetosis : Episodic Kinesigenic Dyskinesia 1; EKD1	602066 : 128200			This gene encodes a transmembrane protein containing a proline-rich domain in its N-terminal half. Studies in mice suggest that it is predominantly expressed in brain and spinal cord in embryonic and postnatal stages. Mutations in this gene are associated with episodic kinesigenic dyskinesia-1. Alternatively spliced transcript variants encoding different isoforms have been found for this gene. [p…	integral component of membrane; neuromuscular process controlling posture; synapse;	N/A
Pycr2	pyrroline-5-carboxylate reductase family, member 2	1810018M05Rik, P5cr2	1277956	http://www.informatics.jax.org/marker/key/37280	29920	PYCR2	HLD10, P5CR2	1q42.12; chr1:225919877-225924340 (-)	No	Leukodystrophy, Hypomyelinating, 10; HLD10	616420			This gene belongs to the pyrroline-5-carboxylate reductase family. The encoded mitochondrial protein catalyzes the conversion of pyrroline-5-carboxylate to proline, which is the last step in proline biosynthesis. Alternatively spliced transcript variants have been described for this gene. [provided by RefSeq, Nov 2012]	pyrroline-5-carboxylate reductase activity; cellular response to oxidative stress; proline biosynthetic process	Low-moderate
Reg3g	regenerating islet-derived 3 gamma	RegIII (gamma)	109406	http://www.informatics.jax.org/marker/key/31448	130120	REG3G	LPPM429, PAP1B, PAP-1B, PAPIB, PAP IB, REG III, REG-III, UNQ429	2p12; chr2:79025686-79028504 (+)	DFNA43, DFNA58	-	-	digestive/alimentary, hematopoietic, immune		This gene encodes a member of the regenerating islet-derived genes (REG)3 protein family. These proteins are secreted, C-type lectins with a carbohydrate recognition domain and N-terminal signal peptide. The protein encoded by this gene is an antimicrobial lectin with activity against Gram-positive bacteria. Alternative splicing results in multiple transcript variants encoding multiple isoforms. …	acute-phase response; defense response to Gram-positive bacterium; inflammatory response; MyD88-dependent toll-like receptor signaling pathway; negative regulation of keratinocyte differentiation; positive regulation of keratinocyte proliferation; positive regulation of wound healing	Low
Rnf10	ring finger protein 10	mKIAA0262	1859162	http://www.informatics.jax.org/marker/key/46661	9921	RNF10	RIE2	12q24.31; chr12:120534308-120577594 (+)	No	-	-	growth/size/body, homeostasis		The protein encoded by this gene contains a ring finger motif, which is known to be involved in protein-protein interactions. The specific function of this protein has not yet been determined. EST data suggests the existence of multiple alternatively spliced transcript variants, however, their full length nature is not known. [provided by RefSeq, Jul 2008]	ubiquitin-protein transferase activity; zinc ion binding; negative regulation of Schwann cell proliferation; positive regulation of myelination; positive regulation of transcription from RNA polymerase II promoter; protein autoubiquitination; regulation of transcription, DNA-templated	Moderate
S100b	S100 protein, beta polypeptide, neural	-	98217	http://www.informatics.jax.org/marker/key/13299	6285	S100B	NEF, S100, S100-B, S100beta	21q22.3; chr21:46598618-46605122 (-)	No	-	-	behavior, integument; homeostasis, nervous system	Homozygotes for targeted null mutations exhibit enhanced spatial memory, fear memory, and long-term potentiation in the hippocampal CA1 region, and more rapid and severe seizures as the result of an amygdala kindling paradigm.	The protein encoded by this gene is a member of the S100 family of proteins containing 2 EF-hand calcium-binding motifs. S100 proteins are localized in the cytoplasm and/or nucleus of a wide range of cells, and involved in the regulation of a number of cellular processes such as cell cycle progression and differentiation. S100 genes include at least 13 members which are located as a cluster on ch…	calcium-dependent protein binding; protein homodimerization activity; RAGE receptor binding; zinc ion binding; neuronal cell body; is a part of brain subventricular zone; learning or memory; positive regulation of synaptic transmission; regulation of neuronal synaptic plasticity	Moderate
Sesn3	sestrin 3	5630400E15Rik, MGC:7182, SEST3	1922997	http://www.informatics.jax.org/marker/key/59727	143686	SESN3	SEST3	11q21; chr11:95165513-95232541 (-)	No				When fed a high fat diet, mice homozygous for a gene trap allele exhibit impaired glucose tolerance, insulin resistance, reduced hepatic glucose production, impaired adipocyte glucose uptake, increased hepatic steatosis, and decreased mitochondria in the liver.	This gene encodes a member of the sestrin family of stress-induced proteins. The encoded protein reduces the levels of intracellular reactive oxygen species induced by activated Ras downstream of RAC-alpha serine/threonine-protein kinase (Akt) and FoxO transcription factor. The protein is required for normal regulation of blood glucose, insulin resistance and plays a role in lipid storage in obes…	oxidoreductase activity; colocalizes_with TORC2 complex; colocalizes_with GATOR2 complex; cellular response to amino acid stimulus; glucose homeostasis; negative regulation of TORC1 signaling; regulation of insulin receptor signaling pathway; regulation of protein kinase B signaling; response to insulin; regulation of response to reactive oxygen species; TORC2 signaling	Low-moderate
Supv3l1 (Het)	suppressor of var1, 3-like 1 (S. cerevisiae)	6330443E10Rik	2441711	http://www.informatics.jax.org/marker/key/83075	6832	SUPV3L1	SUV3	10q22.1; chr10:69180204-69209098 (+)	No	-	-	craniofacial, embryo, mortality/aging, reproductive; adipose, behavior, cardiovascular, cellular, digestive/alimentary, endocrine/exocrine, growth/size/body, hematopoietic, immune, integument, muscle, respiratory, skeleton; hearing/vestibular/ear	Mice homozygous for a hypomorphic allele exhibit embryonic lethality between E9.5 and E12.5. Mice homozygous for a knock-out allele exhibit embryonic lethality between E8.5 and 9.5. Mice heterozygous for this allele produce offspring with mitochondrial defects regardless of offspring genotype.		ATP-dependent RNA helicase activity; mitochondrial degradosome; hydrolase activity, acting on acid anhydrides; mitochondrial mRNA surveillance; chromatin maintenance	Low-moderate
Tmem189	transmembrane protein 189		2142624	http://www.informatics.jax.org/marker/key/70064	387521	TMEM189	KUA	20q13.13; chr20:50123737-50153798 (-)	No					Co-transcription of this gene and the neighboring downstream gene (ubiquitin-conjugating enzyme E2 variant 1) generates a rare read-through transcript, which encodes a fusion protein comprised of sequence sharing identity with each individual gene product. The protein encoded by this individual gene lacks a UEV1 domain but includes three transmembrane regions. Alternative splicing results in mult…	ubiquitin protein ligase activity; protein ubiquitination	Moderate
Tmod1	tropomodulin 1	erythrocyte tropomodulin, E-Tmod	98775	http://www.informatics.jax.org/marker/key/14177	7111	TMOD1	D9S57E, ETMOD, TMOD	9q22.33; chr9:97501180-97601743 (+)	No			cardiovascular, embryo, growth/size/body, hematopoietic, homeostasis, mortality/aging, muscle; vision/eye	Homozygous inactivation of this locus results in aborted heart development and consequent embryonic lethality.	This gene encodes a member of the tropomodulin family. The encoded protein is an actin-capping protein that regulates tropomyosin by binding to its N-terminus, inhibiting depolymerization and elongation of the pointed end of actin filaments and thereby influencing the structure of the erythrocyte membrane skeleton. Multiple transcript variants encoding the same protein have been found for this ge…	actin binding; tropomyosin binding; colocalizes_with COP9 signalosome; cortical cytoskeleton, part of erythrocyte; sarcomere, is a part of cardiac muscle cell; actin filament organization; adult locomotory behavior; lens fiber cell development; pointed-end actin filament capping	Very high
Category 7 : New Alleles of Known Deafness Genes
Myo15	myosin XV	-	1261811	http://www.informatics.jax.org/marker/key/36272	51168	MYO15A	DFNB3, MYO15	17p11.2; chr17:18108706-18180225 (+)	N/A	Deafness, Autosomal Recessive 3; DFNB3	600316	behavior, hearing/vestibular/ear, nervous system	Mutations in this gene result in profound deafness and neurological behavior.	This gene encodes an unconventional myosin. This protein differs from other myosins in that it has a long N-terminal extension preceding the conserved motor domain. Studies in mice suggest that this protein is necessary for actin organization in the hair cells of the cochlea. Mutations in this gene have been associated with profound, congenital, neurosensory, nonsyndromal deafness. This gene is l…	actin binding; ATP binding; motor activity; stereocilium bundle; sensory perception of sound; locomotory behavior	High
Myo7a	myosin VIIA	Hdb, Myo7, nmf371, polka, USH1B	104510	http://www.informatics.jax.org/marker/key/24643	4647	MYO7A	DFNA11, DFNB2, MYOVIIA, MYU7A, NSRD2, USH1B	11q13.5; chr11:77128214-77215241 (+)	N/A	Deafness, Autosomal Recessive 2; DFNB2 : Usher Syndrome, Type I; USH1 : Deafness, Autosomal Dominant 11; DFNA11	600060 : 276900 : 601317	behavior, hearing/vestibular/ear, nervous system, pigmentation, vision/eye; reproductive	A number of spontaneous and ENU-induced mutations cause head-shaking, circling and deafness, often associated with cochlear hair cell degeneration and stereocilia anomalies. Defects in retinal pigment epithelial cells, male infertility, and light-inducedphotoreceptor damage have also been observed.	This gene is a member of the myosin gene family. Myosins are mechanochemical proteins characterized by the presence of a motor domain, an actin-binding domain, a neck domain that interacts with other proteins, and a tail domain that serves as an anchor. This gene encodes an unconventional myosin with a very short tail. Defects in this gene are associated with the mouse shaker-1 phenotype and the …	actin binding; actin-dependent ATPase activity; calmodulin binding; motor activity; apical plasma membrane; lysosomal membrane; melanosome; microvillus; stereocilium; synapse; auditory receptor cell stereocilium organization; inner ear development ; mechanoreceptor differentiation; pigment granule localization; phagolysosome assembly; sensory perception of light stimulus; sensory perception of so…	High
Ush1c	Usher syndrome 1C	2010016F01Rik, harmonin	1919338	http://www.informatics.jax.org/marker/key/56068	10083	USH1C	AIE-75, DFNB18, DFNB18A, NY-CO-37, NY-CO-38, PDZ-45, PDZ73, PDZ-73, PDZ-73/NY-CO-38, PDZD7C, ush1cpst	11p15.1; chr11:17493895-17544416 (-)	N/A	Deafness, Autosomal Recessive 18a; DFNB18A : Usher Syndrome, Type Ic; USH1C : Usher Syndrome, Type I; USH1	602092 : 276904 : 276900	behavior, hearing/vestibular/ear, nervous system, vision/eye; digestive/alimentary	Mutations at this locus affect hearing and result in movement anomalies generally associated with vestibular mutants, such as head tossing and circling.	This gene encodes a scaffold protein that functions in the assembly of Usher protein complexes. The protein contains PDZ domains, a coiled-coil region with a bipartite nuclear localization signal and a PEST degradation sequence. Defects in this gene are the cause of Usher syndrome type 1C and non-syndromic sensorineural deafness autosomal recessive type 18. Multiple transcript variants encoding d…	actin filament binding; myosin tail binding; cytoskeleton; microvillus; photoreceptor inner segment; photoreceptor outer segment; stereocilium; synapse; actin filament bundle assembly; auditory receptor cell differentiation; brush border assembly; equilibrioception; inner ear receptor stereocilium organization; neuromuscular process controlling balance; parallel actin filament bundle assembly; pr…	High
Ildr1	immunoglobulin-like domain containing receptor 1	-	2146574	http://www.informatics.jax.org/marker/key/74014	286676	ILDR1	DFNB42, ILDR1alpha, ILDR1alpha', ILDR1beta	3q13.33; chr3:121987323-122060516 (-)	N/A	Deafness, Autosomal Recessive 42; DFNB42	609646	hearing/vestibular/ear, homeostasis, nervous system	Mice homozygous for a gene trap allele exhibit impaired lipid-induced cholecystokinin secretion. Mice homozygous for a knockout allele exhibit progressive sensorineural hearing loss with outer and inner cochlear hair cell degeneration.	This gene encodes a protein that contains an immunoglobulin-like domain. The encoded protein may function as a multimeric receptor at the cell surface. The expression of this gene may be a diagnostic marker for cancer progression. Alternatively spliced transcript variants encoding multiple protein isoforms have been observed for this gene. [provided by RefSeq, Dec 2010]	high-density lipoprotein particle receptor activity; integral component of membrane; tricellular tight junction; positive regulation of peptide hormone secretion	Low-moderate
Espn	espin	-	1861630	http://www.informatics.jax.org/marker/key/47309	83715	ESPN	DFNB36, LP2654	1p36.31; chr1:6424776-6460944 (+)	N/A	Deafness, Autosomal Recessive 36, with or without Vestibular Involvement	609006	behavior, digestive/alimentary, hearing/vestibular/ear, nervous system	Homozygotes for a spontaneous mutation exhibit progressive degeneration of both inner and outer hair cells, severe deafness, vestibular dysfunction, and poor mothering ability. Heterozygotes show a progressive, age-related hearing loss.	This gene encodes a multifunctional actin-bundling protein. It plays a major role in regulating the organization, dimensions, dynamics, and signaling capacities of the actin filament-rich, microvillus-type specializations that mediate sensory transduction in various mechanosensory and chemosensory cells. Mutations in this gene are associated with autosomal recessive neurosensory deafness, and aut…	actin filament binding; SH3 domain binding; brush border; microvillus; stereocilium tip; stereocilium bundle; actin filament network formation; parallel actin filament bundle assembly; positive regulation of filopodium assembly; negative regulation of cytoskeleton organization; sensory perception of sound	High
Whrn (also waveform anomaly)	whirlin	1110035G07Rik, C430046P22Rik, Dfnb31, mKIAA1526, wi	2682003	http://www.informatics.jax.org/marker/key/94311	25861	DFNB31	CIP98, DFNB31, PDZD7B, USH2D, WI	9q32; chr9:114402078-114505509 (-)	N/A	Deafness, Autosomal Recessive 31; DFNB31 : Usher Syndrome, Type Iid; USH2D	607084 : 611383	adipose, behavior, cardiovascular, endocrine/exocrine, growth/size/body, hearing/vestibular/ear, hematopoietic, homeostasis, immune, liver/biliary, nervous system, renal/urinary, reproductive; vision/eye	Spontaneous mutants lacking both isoforms show short stereocilia, severe deafness and vestibular deficits. Targeted homozygotes lacking the long form show altered OHC stereocilia bundles but a milder phenotype with normal stereocilia in IHCs and a subset of vestibular HCs and no vestibular deficits.	This gene is thought to function in the organization and stabilization of sterocilia elongation and actin cystoskeletal assembly, based on studies of the related mouse gene. Mutations in this gene have been associated with autosomal recessive non-syndromic deafness and Usher Syndrome. Alternative splicing of this gene results in multiple transcript variants encoding different isoforms.[provided b…	protein heterodimerization activity; protein homodimerization activity; actin filament; ciliary basal body; cilium; periciliary membrane compartment; photoreceptor connecting cilium; photoreceptor inner segment; stereocilia ankle link complex; stereocilium tip ; USH2 complex; auditory receptor cell stereocilium organization; cerebellar Purkinje cell layer formation; paranodal junction maintenance…	Low-moderate
Cep250 (also waveform anomaly)	centrosomal protein 250	B230210E21Rik, Cep2, Inmp	108084	http://www.informatics.jax.org/marker/key/29553	11190	CEP250	CEP2, CNAP1, C-NAP1	20q11.22; chr20:35455139-35517531 (+)	No	Atypical Usher Syndrome				This gene encodes a core centrosomal protein required for centriole-centriole cohesion during interphase of the cell cycle. The encoded protein dissociates from the centrosomes when parental centrioles separate at the beginning of mitosis. The protein associates with and is phosphorylated by NIMA-related kinase 2, which is also associated with the centrosome. Alternative splicing results in multi…	protein C-terminus binding; protein kinase binding; centriole; centrosome; spindle pole centrosome; mitotic cell cycle; non-motile cilium assembly; regulation of centriole-centriole cohesion	N/A
Srrm4 (also waveform anomaly)	serine/arginine repetitive matrix 4	1500001A10Rik, B230202K19Rik, bv, flopsy, fp, mKIAA1853, nSR100	1916205	http://www.informatics.jax.org/marker/key/52935	84530	SRRM4	KIAA1853, MU-MB-2.76, nSR100	12q24.23; chr12:118981486-119163053 (+)	No	-	-	behavior, hearing/vestibular/ear, nervous system	Mutants show waltzing behavior, inner ear abnormalities, and deafness.	SRRM4 promotes alternative splicing and inclusion of neural-specific exons in target mRNAs (Calarco et al., 2009 [PubMed 19737518]).[supplied by OMIM, Oct 2009]	mRNA binding; cell differentiation; nervous system development; regulation of alternative mRNA splicing, via spliceosome; sensory perception of sound	High
Clpp (also waveform anomaly)	caseinolytic mitochondrial matrix peptidase proteolytic subunit	D17Wsu160e	1858213	http://www.informatics.jax.org/marker/key/46353	8192	CLPP	DFNB81, PRLTS3	19p13.3; chr19:6361452-6368904 (+)	DFNB81?	Perrault Syndrome 3; PRLTS3	614129	behavior, cellular, embryo, endocrine/exocrine, growth/size/body, hematopoietic, immune, integument, mortality/aging, reproductive	Mice homozygous for a gene trap allele exhibit infertility, hearing loss, growth retardation, reduced activity, T cell activation, increased mitochondrial DNA and premature death.	The protein encoded by this gene belongs to the peptidase family S14 and hydrolyzes proteins into small peptides in the presence of ATP and magnesium. The protein is transported into mitochondrial matrix and is associated with the inner mitochondrial membrane. [provided by RefSeq, Jul 2008]	serine-type endopeptidase activity; endopeptidase Clp complex; mitochondrial matrix; misfolded or incompletely synthesized protein catabolic process; protein homooligomerization; proteolysis involved in cellular protein catabolic process	Very high
Category 8 : Positive Control - Known Hearing Impaired Mouse mutants
Atp2b2<Obv> (Het)	ATPase, Ca++ transporting, plasma membrane 2	DEA14, Obl; D6Abb2e, Gena300, jog, PMCA2, Tmy, wms	105368	http://www.informatics.jax.org/marker/key/25866	491	ATP2B2	PMCA2, PMCA2a, PMCA2i	3p25.3; chr3:10324023-10707993 (-)	N/A	Modifier of CDH23, Deafness, Autosomal Recessive 12; DFNB12	601386	behavior, hearing/vestibular/ear, nervous system; reproductive; homeostasis; growth/size/body	Homozygous mutants exhibit slower growth, balance problems, and deafness, associated with cerebellar abnormalities, an absence of otoconia, and abnormalities of the organ of Corti. Heterozygotes exhibit appreciable age-dependent hearing loss.	The protein encoded by this gene belongs to the family of P-type primary ion transport ATPases characterized by the formation of an aspartyl phosphate intermediate during the reaction cycle. These enzymes remove bivalent calcium ions from eukaryotic cells against very large concentration gradients and play a critical role in intracellular calcium homeostasis. The mammalian plasma membrane calcium…	calcium-dependent ATPase activity; calmodulin binding; glutamate receptor binding; PDZ domain binding; protein C-terminus binding; apical plasma membrane; cilium; integral component of plasma membrane; neuronal cell body; auditory receptor cell stereocilium organization; calcium ion transport; cellular calcium ion homeostasis; cerebellar granule cell differentiation; cerebellar Purkinje cell diff…	Moderate
Cdh23<v>	cadherin 23 (otocadherin)	4930542A03Rik, ahl, bob, mdfw, nmf112, nmf181, nmf252, sals, USH1D	1890219	http://www.informatics.jax.org/marker/key/63379	64072	CDH23	CDHR23, USH1D	10q22.1; chr10:71396934-71815947 (+)	N/A	Deafness, Autosomal Recessive 12; DFNB12 : Usher Syndrome, Type ID; USH1D	601386 : 601067	behavior, hearing/vestibular/ear, nervous system; craniofacial, growth/size/body; cellular, reproductive	Mutant mice exhibit circling behavior, tilting of the head and are deaf. Mice homozygous for a targeted knock-out exhibit abnormal outer hair cells morphology.	This gene is a member of the cadherin superfamily, whose genes encode calcium dependent cell-cell adhesion glycoproteins. The encoded protein is thought to be involved in stereocilia organization and hair bundle formation. The gene is located in a region containing the human deafness loci DFNB12 and USH1D. Usher syndrome 1D and nonsyndromic autosomal recessive deafness DFNB12 are caused by alleli…	protein N-terminus binding; centrosome; kinocilium; photoreceptor inner segment; stereocilium tip; plasma membrane; synapse; adult locomotory behavior; auditory receptor cell differentiation; auditory receptor cell stereocilium organization; calcium ion transport; calcium-dependent cell-cell adhesion via plasma membrane cell adhesion molecules; equilibrioception; inner ear receptor stereocilium o…	Moderate
Chd7<Whi> (Het)	chromodomain helicase DNA binding protein 7	WBE1; A730019I05Rik, Cycn, Cyn, Dz, Edy, Flo, GENA 47, Gena 52, GENA 60, Lda, Mt, Obt, Todo, Whi	2444748	http://www.informatics.jax.org/marker/key/85644	55636	CHD7	CRG, HH5, IS3, KAL5	8q12.2; chr8:60678762-60868028 (+)	N/A	CHARGE Syndrome : Hypogonadotropic Hypogonadism 5 with or without Anosmia; HH5 : Tracheoesophageal Fistula with or without Esophageal Atresia	214800 : 612370 : 189960	behavior, embryo, growth/size/body, hearing/vestibular/ear, mortality/aging, nervous system, reproductive, vision/eye; craniofacial; immune; skeleton; endocrine/exocrine, hematopoietic; cellular; limbs/digits/tail; respiratory	Heterozygotes for mutations of this gene exhibit a variety of combinations of hyperactivity, circling, head-bobbing, semicircular canal defects, hearing loss, reduced size, and tail-kink.	This gene encodes a protein that contains several helicase family domains. Mutations in this gene have been found in some patients with the CHARGE syndrome. Two transcript variants encoding different isoforms have been found for this gene. [provided by RefSeq, Oct 2015]	chromatin remodeling; semicircular canal morphogenesis; promoter-specific chromatin binding; RNA polymerase II core promoter proximal region sequence-specific DNA binding; adult heart development; adult walking behavior; atrioventricular canal development; blood circulation; blood vessel remodeling; camera-type eye development ; cardiac septum morphogenesis; central nervous system development; cr…	High
Grxcr1<tde>	glutaredoxin, cysteine rich 1	pi, tde	3577767	http://www.informatics.jax.org/marker/key/154515	389207	GRXCR1	DFNB25, PPP1R88	4p13; chr4:42893266-43030658 (+)	N/A	Deafness, Autosomal Recessive 25; DFNB25	613285	behavior, cellular, hearing/vestibular/ear, nervous system	Homozygous mutations at this locus result in circling and head tossing behavior, and impaired hearing.	This gene is one of 60 loci associated with autosomal-recessive nonsyndromic hearing impairment. This gene encodes a protein which contains GRX-like domains; these domains play a role in the S-glutathionylation of proteins and may be involved in actin organization in hair cells. [provided by RefSeq, Sep 2010]	kinocilium; stereocilium; auditory receptor cell differentiation; vestibular receptor cell development; negative regulation of phosphatase activity; sensory perception of sound	Very high
Mir96<Dmdo>	microRNA 96	DEA12, diminuendo, Dmdo; mir 96, Mirn96, mmu-mir-96	3619440	http://www.informatics.jax.org/marker/key/170931	407053	MIR96	DFNA50, hsa-mir-96, miR-96, MIRN96, miRNA96	chr7:129774692-129774769 (-)	N/A	Deafness, Autosomal Dominant 50; DFNA50	613074		Mice homozygous and heterozygous for an ENU-induced mutation exhibit hearing loss associated with hair cell degeneration.		auditory receptor cell morphogenesis; adult locomotory behavior; regulation of gene expression; retina development in camera-type eye; retinal cone cell development; sensory perception of sound	Low
Myo6<sv>	myosin VI	Tlc	104785	http://www.informatics.jax.org/marker/key/25046	4646	MYO6	DFNA22, DFNB37	6q14.1; chr6:75749176-75919537 (+)	N/A	Deafness, Autosomal Dominant 22; DFNA22 : Deafness, Autosomal Recessive 37; DFNB37	606346 : 607821	behavior, cardiovascular, cellular, hearing/vestibular/ear, muscle, nervous system	Homozygous mutant mice exhibit deafness and related behavioral characteristics such as circling, head tossing and hyperactivity. Progressive degeneration of the cochlear hair cells and the organ of Corti is observed with one mutation.	This gene encodes a reverse-direction motor protein that moves toward the minus end of actin filaments and plays a role in intracellular vesicle and organelle transport. The protein consists of a motor domain containing an ATP- and an actin-binding site and a globular tail which interacts with other proteins. This protein maintains the structural integrity of inner ear hair cells and mutations in…	actin filament binding; ATP binding; motor activity; brush border; colocalizes_with clathrin-coated endocytic vesicle; filamentous actin; Golgi apparatus; neuronal cell body; perinuclear region of cytoplasm; ruffle membrane; synapse; vesicle membrane; auditory receptor cell differentiation; cellular response to electrical stimulus; chemical synaptic transmission; dendrite development; endocytosis…	Very high
Myo7a<Hdb>	myosin VIIA	Hdb, Myo7, nmf371, polka, USH1B	104510	http://www.informatics.jax.org/marker/key/24643	4647	MYO7A	DFNA11, DFNB2, MYOVIIA, MYU7A, NSRD2, USH1B	11q13.5; chr11:77128214-77215241 (+)	N/A	Deafness, Autosomal Recessive 2; DFNB2 : Usher Syndrome, Type I; USH1 : Deafness, Autosomal Dominant 11; DFNA11	600060 : 276900 : 601317	behavior, cellular, hearing/vestibular/ear, nervous system; pigmentation, vision/eye; reproductive	A number of spontaneous and ENU-induced mutations cause head-shaking, circling and deafness, often associated with cochlear hair cell degeneration and stereocilia anomalies. Defects in retinal pigment epithelial cells, male infertility, and light-inducedphotoreceptor damage have also been observed.	This gene is a member of the myosin gene family. Myosins are mechanochemical proteins characterized by the presence of a motor domain, an actin-binding domain, a neck domain that interacts with other proteins, and a tail domain that serves as an anchor. This gene encodes an unconventional myosin with a very short tail. Defects in this gene are associated with the mouse shaker-1 phenotype and the …	actin-dependent ATPase activity; actin filament binding; calmodulin binding; motor activity; protein domain specific binding; apical plasma membrane; melanosome; photoreceptor connecting cilium; stereocilium; synapse; actin filament-based movement; auditory receptor cell differentiation; auditory receptor cell stereocilium organization; equilibrioception; mechanoreceptor differentiation; phagolys…	High
Myo7a<sh1-6J>	myosin VIIA	Hdb, Myo7, nmf371, polka, USH1B	104510	http://www.informatics.jax.org/marker/key/24643	4647	MYO7A	DFNA11, DFNB2, MYOVIIA, MYU7A, NSRD2, USH1B	11q13.5; chr11:77128214-77215241 (+)	N/A	Deafness, Autosomal Recessive 2; DFNB2 : Usher Syndrome, Type I; USH1 : Deafness, Autosomal Dominant 11; DFNA11	600060 : 276900 : 601317	behavior, cellular, hearing/vestibular/ear, nervous system; pigmentation, vision/eye; reproductive	A number of spontaneous and ENU-induced mutations cause head-shaking, circling and deafness, often associated with cochlear hair cell degeneration and stereocilia anomalies. Defects in retinal pigment epithelial cells, male infertility, and light-inducedphotoreceptor damage have also been observed.	This gene is a member of the myosin gene family. Myosins are mechanochemical proteins characterized by the presence of a motor domain, an actin-binding domain, a neck domain that interacts with other proteins, and a tail domain that serves as an anchor. This gene encodes an unconventional myosin with a very short tail. Defects in this gene are associated with the mouse shaker-1 phenotype and the …		High
Tmc1<dn>	transmembrane channel-like gene family 1	4933416G09Rik, Beethoven, Bth	2151016	http://www.informatics.jax.org/marker/key/79857	117531	TMC1	DFNA36, DFNB11, DFNB7	9q21.13; chr9:72521801-72836351 (+)	N/A	Deafness, Autosomal Dominant 36; DFNA36 : Deafness, Autosomal Recessive 7; DFNB7	606705 : 600974	behavior, hearing/vestibular/ear, nervous system	Mutant mice are characterized by progressive degeneration of the cochlear inner hair cells and concomitant deafness. Different alleles causing progressive deafness or profound congenital deafness.	This gene is considered a member of a gene family predicted to encode transmembrane proteins. The specific function of this gene is unknown; however, it is known to be required for normal function of cochlear hair cells. Mutations in this gene have been associated with progressive postlingual hearing loss and profound prelingual deafness. [provided by RefSeq, Jul 2008]	contributes_to mechanically-gated ion channel activity; voltage-gated calcium channel activity; external side of plasma membrane; stereocilium tip; detection of mechanical stimulus involved in sensory perception of sound; regulation of calcium ion transmembrane transport; vestibular reflex; sensory perception of sound	Low
Whrn<wi>	whirlin	1110035G07Rik, C430046P22Rik, Dfnb31, mKIAA1526, wi	2682003	http://www.informatics.jax.org/marker/key/94311	25861	DFNB31	CIP98, DFNB31, PDZD7B, USH2D, WI	9q32; chr9:114402078-114505509 (-)	N/A	Deafness, Autosomal Recessive 31; DFNB31 : Usher Syndrome, Type Iid; USH2D	607084 : 611383	adipose, behavior, cardiovascular, endocrine/exocrine, growth/size/body, hearing/vestibular/ear, hematopoietic, homeostasis, immune, liver/biliary, nervous system, renal/urinary, reproductive; vision/eye	Spontaneous mutants lacking both isoforms show short stereocilia, severe deafness and vestibular deficits. Targeted homozygotes lacking the long form show altered OHC stereocilia bundles but a milder phenotype with normal stereocilia in IHCs and a subset of vestibular HCs and no vestibular deficits.	This gene is thought to function in the organization and stabilization of sterocilia elongation and actin cystoskeletal assembly, based on studies of the related mouse gene. Mutations in this gene have been associated with autosomal recessive non-syndromic deafness and Usher Syndrome. Alternative splicing of this gene results in multiple transcript variants encoding different isoforms.[provided b…	protein heterodimerization activity; protein homodimerization activity; actin filament; ciliary basal body; cilium; periciliary membrane compartment; photoreceptor connecting cilium; photoreceptor inner segment; stereocilia ankle link complex; stereocilium tip ; USH2 complex; auditory receptor cell stereocilium organization; cerebellar Purkinje cell layer formation; paranodal junction maintenance…	Low-moderate
Inclusion criteria for genes above
Threshold above 95% confidence interval for at least one stimulus in 60% of mice of that genotype tested in MGP screen or
*Mean threshold for at least one stimulus more than 20 dB above wildtype mean or
†Further data obtained after screen confirmed raised thresholds in a larger n
Note: All hits listed were in homozygotes unless noted as in hets. 4 or more mice screened unless lower number given.
